# Supplementary material
Source: Springer Nature journal article supplement (https://www.springermedizin.de/resource/supplementary/12891_2007_332_MOESM1_ESM.pdf/9511070)
Supplement: MOESM1 [file 9511070]

512 patients (357 women / 155 men)

87 patients not eligible for inclusion (55 women / 32 men):  
*11 dead, 13 dementia, 34 other region, 22 already on treatment, 7 pathological fracture*

425 patients (302 women / 123 men)

137 patients excluded (93 women / 44 men):  
*62 no show on DXA appointment*  
*64 refused cooperation*  
*11 other reasons for exclusion*

288 patients (209 women / 79 men)

11 patients excluded (9 women / 2 men):  
*11 no follow-up*

277 patients (200 women / 77 men)
